# Supplementary material for: Tuning the decarboxylation selectivity for deoxygenation of vegetable oil over Pt–Ni bimetal catalysts via surface engineering
Source: Royal Society of Chemistry journal article supplement (doi:10.1039/c7cy02440a), 2018-01-01
Supplement: c7cy02440a1.pdf [file c7cy02440a1.pdf]

# **Tuning Decarboxylation Selectivity for Deoxygenation of Vegetable Oil over Pt-Ni Bimetal Catalysts via Surface Engineering**

Hao Chen,<sup>1</sup> Xiangwen Zhang,<sup>1,3</sup> Junfeng Zhang,<sup>2,3</sup> and Qingfa Wang,<sup>1,3\*</sup>

1. Key Laboratory of Green Chemical Technology of Ministry of Education, School of Chemical Engineering and Technology, Tianjin University, Tianjin 300072, China.

2. State Key Laboratory of Engines, School of Mechanical Engineering, Tianjin University, Tianjin 300072, China.

3. Collaborative Innovation Center of Chemical Science and Engineering (Tianjin), Tianjin University, Tianjin 300072, China.

\* Corresponding author

Email: [qfwang@tju.edu.cn](mailto:qfwang@tju.edu.cn)

## **Catalysts Characterizations**

### **XRD**

X-ray diffraction (XRD) was carried out by D/MAX-2500 X-ray diffractometer with Cu-K $\alpha$  radiation at 40 kV and 140 mA. Samples were measured in the  $2\theta$  range from  $5^\circ$  to  $40^\circ$ . The results was shown in Fig S1.

### **CO pulse Chemisorption**

The active metal surface the samples was determined by pulse CO chemisorption employing a Chemisorption Physisorption Analyzer (AMI-300, Altamira Instruments) equipped with a thermal conductivity detector (TCD). Samples were treated in a flow of H<sub>2</sub>/He at 723 K for 3 h and then evacuated at the same temperature for 1 h before measurements. Pulse carbonic oxide chemisorption was conducted at 308 K. The concentrations of chemisorbed CO were calculated assuming a CO/Pt (Ni) stoichiometry of 1.

## Results

### XRD characterization

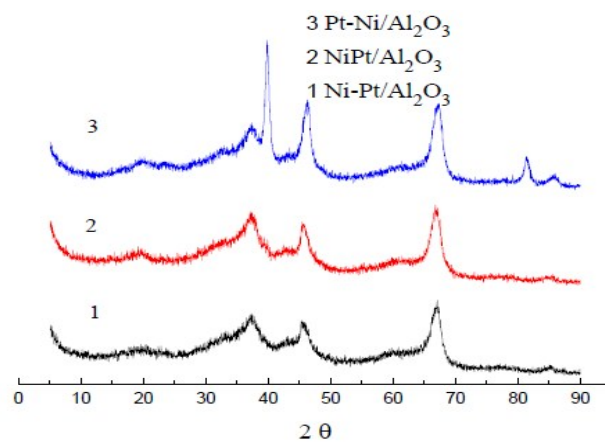

**Fig. S1** XRD results of the series NiPt catalysts.

## TEM characterization

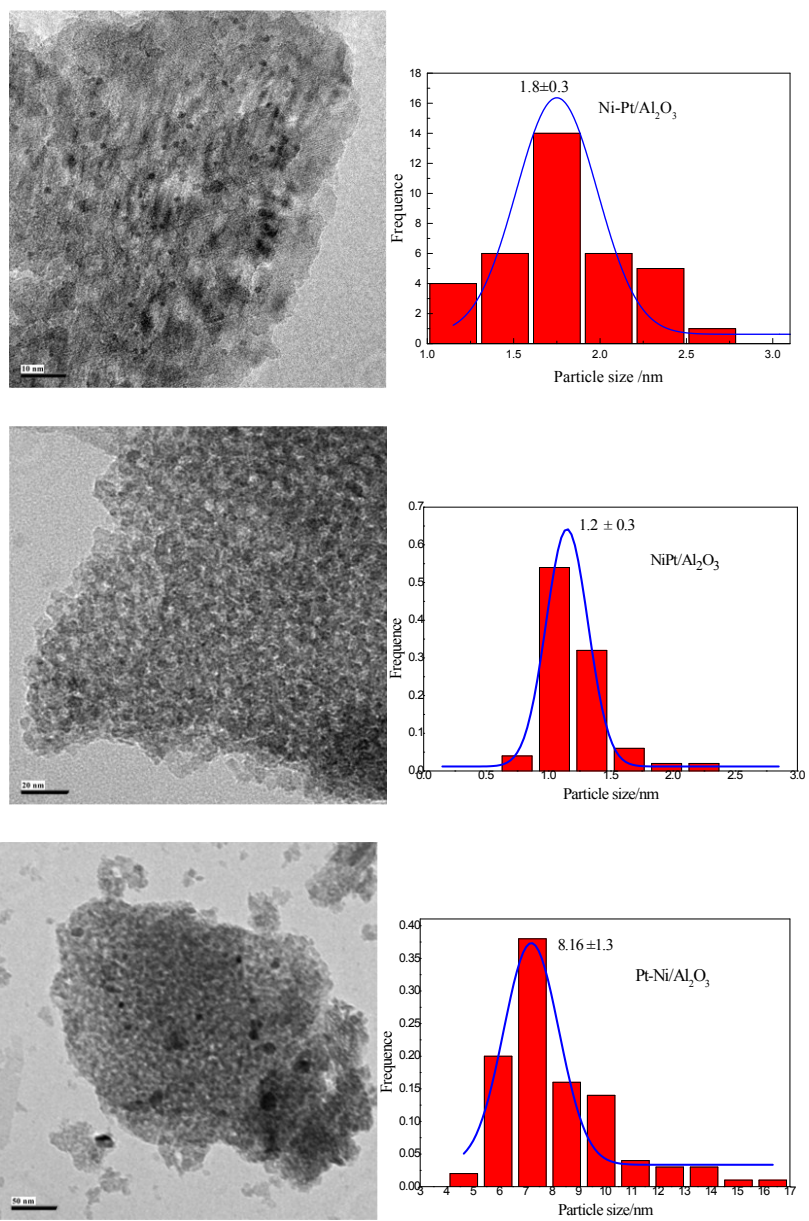

**Fig. S2** TEM results of the series NiPt catalysts.

## Surface area and dispersion calculation

$$ASA (m^2/g) = \frac{L \times f}{d \times \rho}$$
$$dispersion (\%) = \frac{ASA \times M}{N \times A \times L}$$

where L is the weight fraction of metal loading, f is the particle shape correction factor (f = 6 for a sphere), d is the average diameter of the supported particles measured by TEM,  $\rho$  is the metal density (for Ni/Pt,  $\rho = 8.90/21.45$  g/cm<sup>3</sup>), M is the formula weight of the supported metals, N is Avogadro's number, and A is the metal atomic surface area (for Ni/Pt, A = 6.494/8.000 Å<sup>2</sup>/atom).

**Table S1** Dispersion of the metals active sites

|                                      |    | ASA <sup>a</sup> | dispersion <sup>a</sup> % | CO uptake <sub>Pt+Ni</sub> <sup>b</sup> μmol/g |
|--------------------------------------|----|------------------|---------------------------|------------------------------------------------|
| Ni-Pt/Al <sub>2</sub> O <sub>3</sub> | Ni | 18.83            | 0.57                      | 92.2                                           |
|                                      | Pt | 7.81             | 0.63                      |                                                |
| NiPt/Al <sub>2</sub> O <sub>3</sub>  | Ni | 28.09            | 0.84                      | 58.6                                           |
|                                      | Pt | 11.66            | 0.94                      |                                                |
| Pt-Ni/Al <sub>2</sub> O <sub>3</sub> | Ni | 4.13             | 0.12                      | 72.7                                           |
|                                      | Pt | 1.71             | 0.14                      |                                                |

ASA, active metal surface area

<sup>a</sup>, calculate using the measured size of the Ni and Pt nanoparticles

<sup>b</sup>, Estimated from the area under the CO pulse signals.

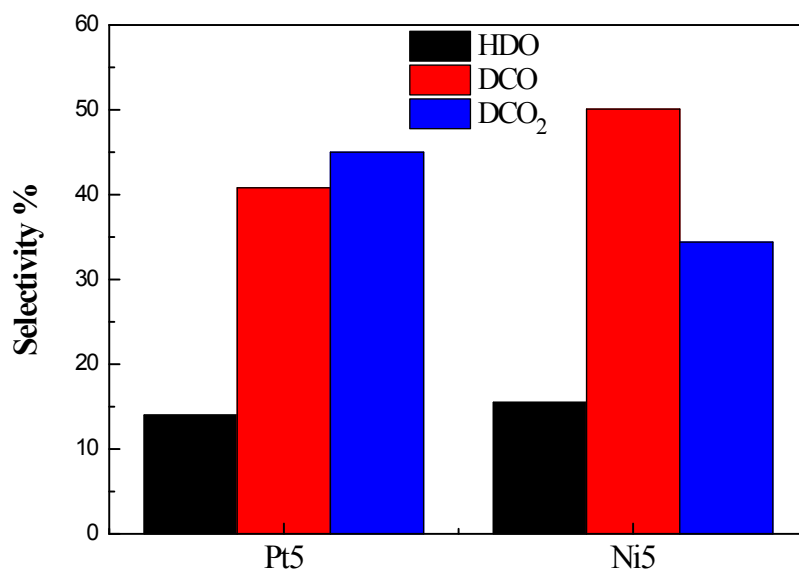

**Fig. S3.** Deoxygenation results of the 5wt% Ni and 5wt% Pt catalysts.
